# Supplementary material
Source: PubMed Central journal article supplement (PMC10016234)

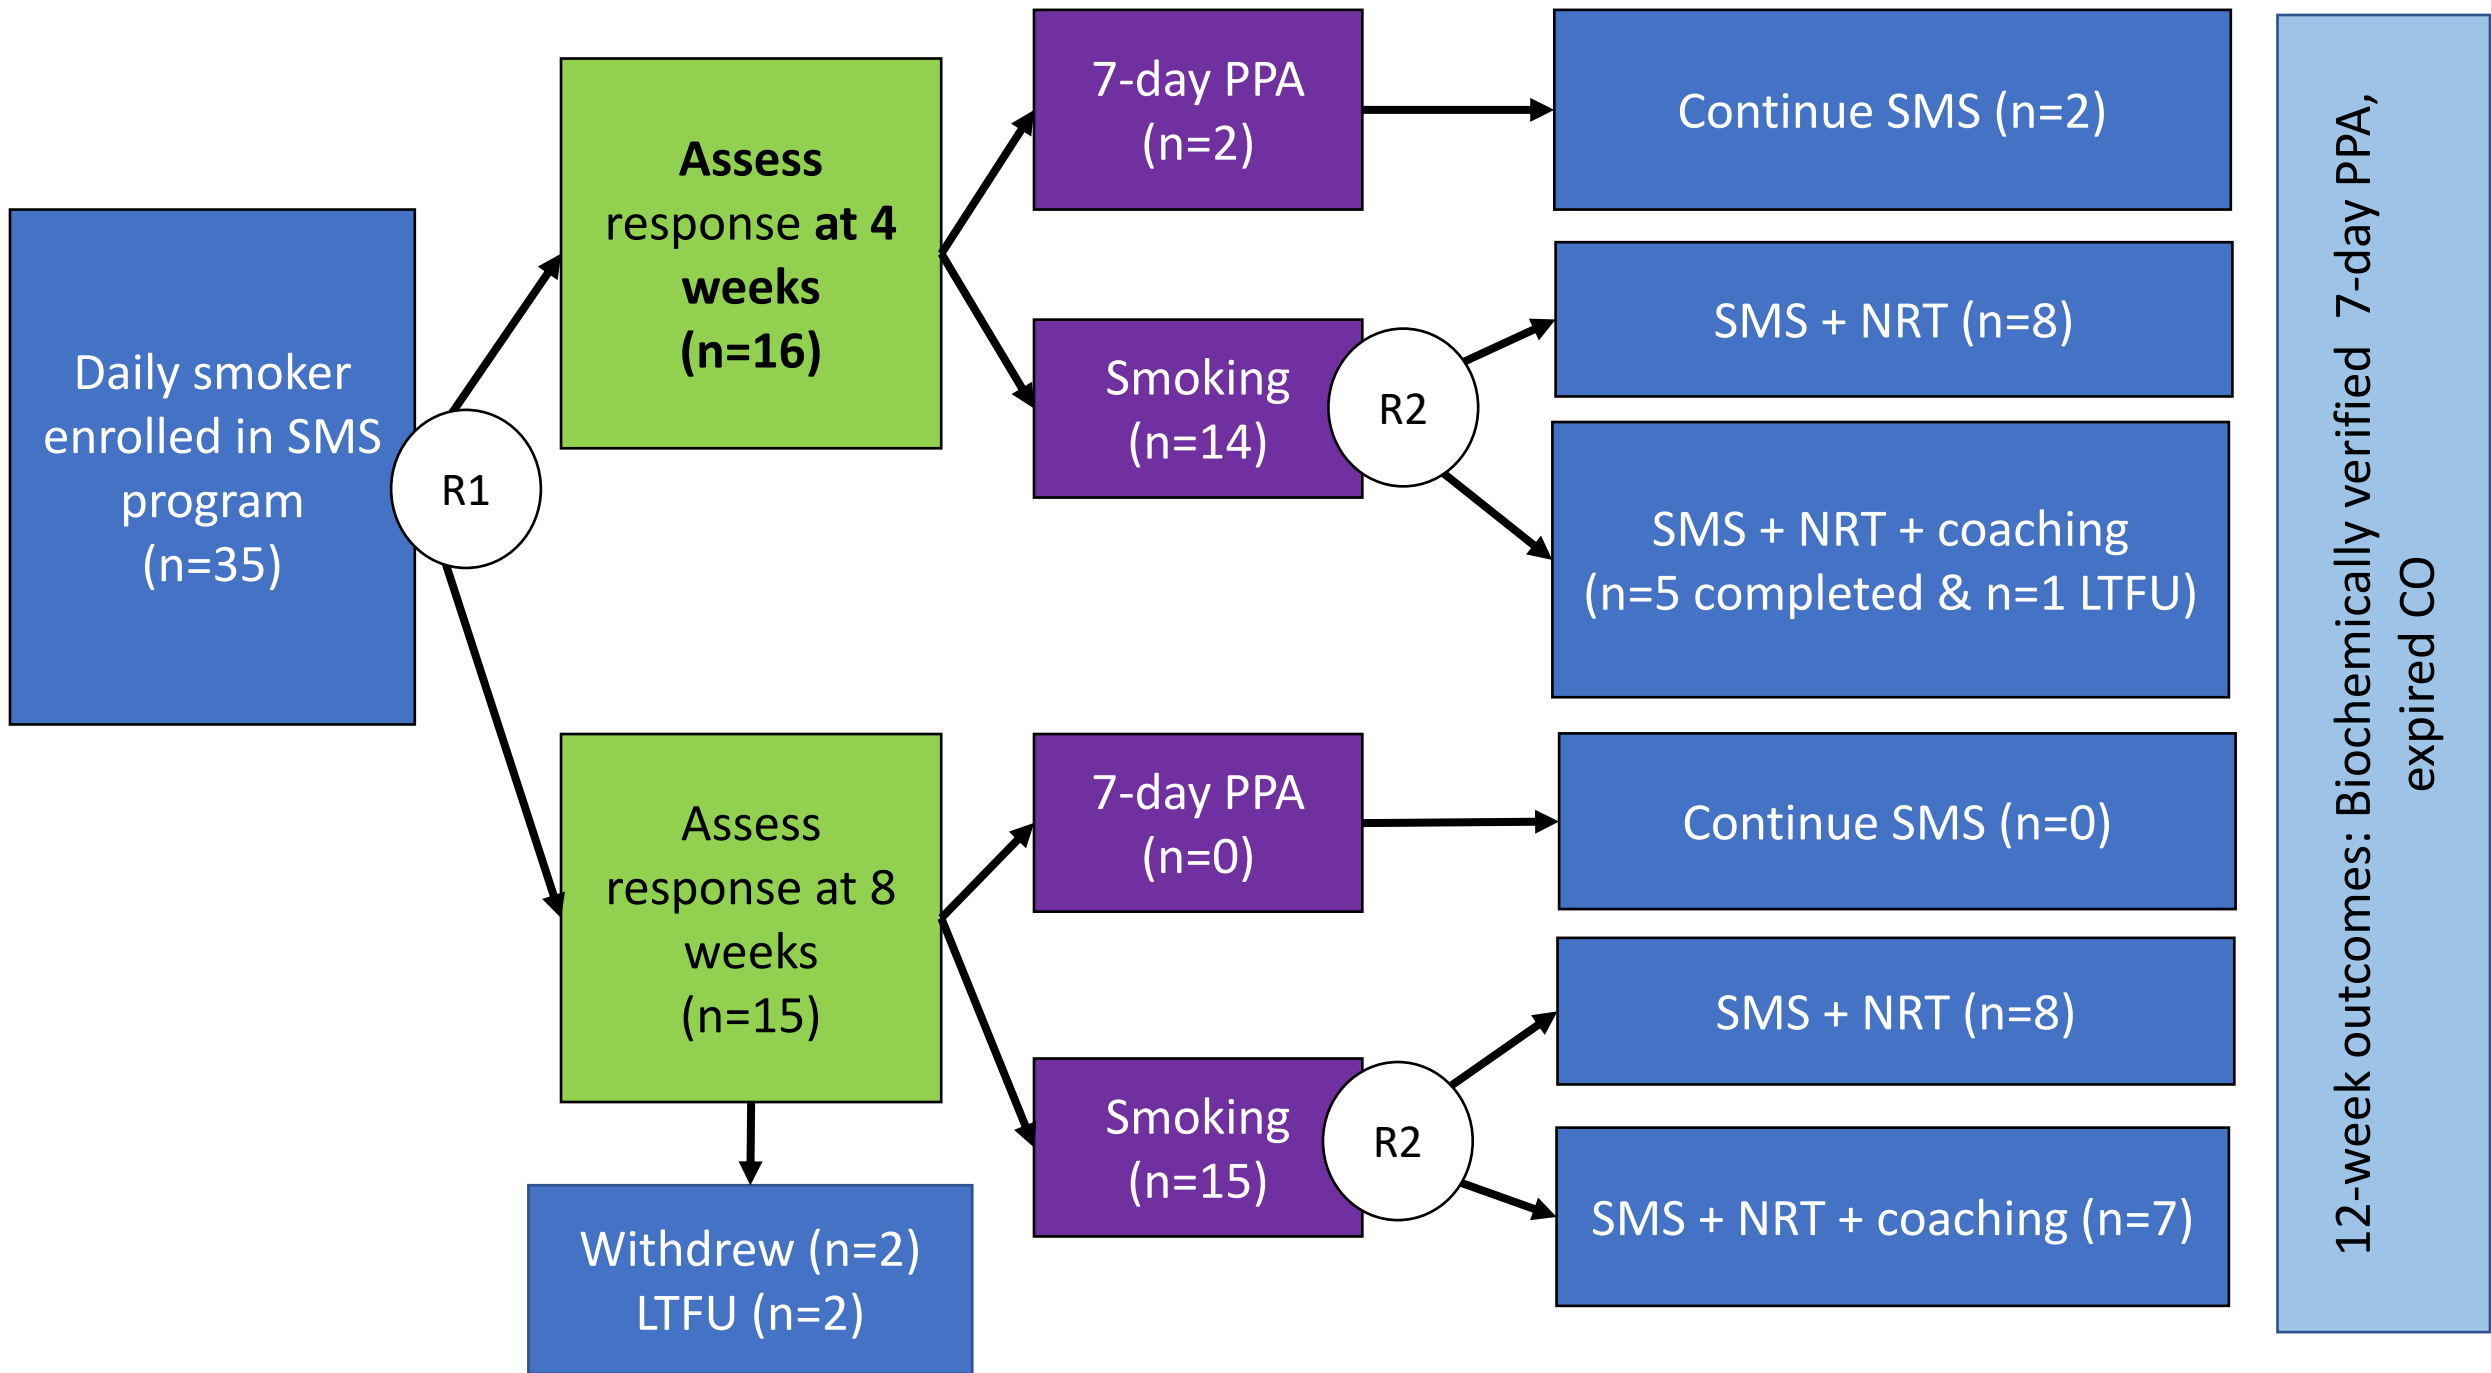

Supplement: NIHMS1877935-supplement-1.pdf [file NIHMS1877935-supplement-1.pdf]
